# Supplementary material
Source: ML conference proceedings conference paper supplement (https://proceedings.neurips.cc/paper_files/paper/2014/hash/b056eb1587586b71e2da9acfe4fbd19e-Abstract.html)
Supplement: Supplementary file [file b056eb1587586b71e2da9acfe4fbd19e-Supplemental.zip]

---

# Submodular Attribute Selection for Action Recognition in Video: Supplementary Material

---

**Jingjing Zheng**  
UMIACS, University of Maryland  
College Park, MD, USA  
zjngjng@umiacs.umd.edu

**Zhuolin Jiang**  
Noah's Ark Lab  
Huawei Technologies  
zhuolin.jiang@huawei.com

**Rama Chellappa**  
UMIACS, University of Maryland  
College Park, MD, USA  
rama@umiacs.umd.edu

**P. Jonathon Phillips**  
National Institute of Standards and Technology  
Gaithersburg, MD, USA  
jonathon.phillips@nist.gov

## 1 Proof of Submodularity of Entropy Rate

Recall our definition of  $\mathcal{H}(\mathcal{S})$ :

$$\mathcal{H}(\mathcal{S}) = - \sum_i u_i \sum_j p_{i,j}(\mathcal{S}) \log(p_{i,j}(\mathcal{S})) \quad (1)$$

where  $u_i$  is the stationary probability of  $v_i$  in the stationary distribution and  $p_{i,j}(\mathcal{S})$  is the transition probability from  $v_i$  to  $v_j$  with respect to  $\mathcal{S}$ .  $\top$

*Proof.* We prove the submodularity by showing

$$\mathcal{H}(\mathcal{S} \cup \{a_1\}) - \mathcal{H}(\mathcal{S}) \geq \mathcal{H}(\mathcal{S} \cup \{a_1, a_2\}) - \mathcal{H}(\mathcal{S} \cup \{a_2\}). \quad (2)$$

It is known that the transition probability with respect to  $\mathcal{S}$  is given as follows:

$$p_{i,j}(\mathcal{S}) = \begin{cases} \frac{w_{i,j}}{w_i} = \frac{\sum_{d \in \mathcal{S}} A_{d,l}}{w_i} & \text{if } i \neq j \\ \frac{w_{i,i}}{w_i} = \frac{\sum_{d \in \mathcal{P} \setminus \mathcal{S}} A_{d,l}}{w_i} & \text{if } i = j \end{cases} \quad (3)$$

where  $w_i = \sum_{m: e_{i,m} \in E} w_{i,m}$  is the sum of incident weights of the vertex  $v_i$  and  $w_{i,i} = w_i - \sum_{j \neq i} w_{i,j}$ ,  $l$  is the index of the combination of pairwise classes  $(i, j)$  in  $\mathcal{U}$ . Without loss of generality, we assume that after the addition of attribute  $a_n$  into  $\mathcal{S}$ , the transition probability becomes

$$p_{i,j}(\mathcal{S} \cup \{a_n\}) = \begin{cases} \frac{w_{i,j}}{w_i} + \frac{A_{n,l}}{w_i} & \text{if } i \neq j \\ \frac{w_{i,i}}{w_i} - \frac{\sum_{j \neq i} A_{n,l}}{w_i} & \text{if } i = j. \end{cases} \quad (4)$$

For simplicity of notation, we let  $p_{i,j}(\mathcal{S}) = p_{i,j}$  and  $p_{i,j}(\mathcal{S} \cup \{a_n\}) = p_{i,j} + \Delta_{i,j}^n$ ,  $n = 1, 2$ , where  $\Delta_{i,j}^n$  is symmetric, i.e.  $\Delta_{i,j}^n = \Delta_{j,i}^n$ . We note that  $\Delta_{i,j}^n \geq 0$  and  $\Delta_{i,i}^n = -\sum_{j \neq i} \Delta_{i,j}^n \leq 0$ .  $\Delta_{i,j}^n = 0$  means that the addition of  $a_n$  doesn't increase the edge weight  $e_{i,j}$  while  $\Delta_{i,j}^n > 0$  means that the addition of  $a_n$  increase  $w_{i,j}$ . Similarly, we let  $p_{i,j}(\mathcal{S} \cup \{a_1, a_2\}) = p_{i,j} + \Delta_{i,j}^1 + \Delta_{i,j}^2$ .

$$\mathcal{H}(\mathcal{S} \cup \{a_1\}) - \mathcal{H}(\mathcal{S}) \quad (5)$$

$$= - \sum_i u_i \sum_j (p_{i,j} + \Delta_{i,j}) \log((p_{i,j} + \Delta_{i,j})) + \sum_i u_i \sum_j p_{i,j} \log p_{i,j} \quad (6)$$

$$= - \sum_i \sum_j \frac{w_i(p_{i,j} + \Delta_{i,j})}{w_0} \log(p_{i,j} + \Delta_{i,j}) - \sum_i \sum_j \frac{w_i(p_{i,j} + \Delta_{i,j})}{w_0} \log \frac{w_i}{w_0} \quad (7)$$

$$+ \sum_i \sum_j \frac{w_i p_{i,j}}{w_0} \log \frac{w_i}{w_0} + \sum_i \sum_j \frac{w_i p_{i,j}}{w_0} \log p_{i,j} \quad (8)$$

$$= - \sum_i \sum_j \frac{w_i(p_{i,j} + \Delta_{i,j})}{w_0} \log \frac{w_i(p_{i,j} + \Delta_{i,j})}{w_0} + \sum_i \sum_j \frac{w_i p_{i,j}}{w_0} \log \frac{w_i p_{i,j}}{w_0} \quad (9)$$

$$= - \sum_i \sum_j \frac{w_i p_{i,j}}{w_0} \log \frac{w_i(p_{i,j} + \Delta_{i,j})}{w_0} + \sum_i \sum_j \frac{w_i p_{i,j}}{w_0} \log \frac{w_i p_{i,j}}{w_0} - \sum_i \sum_j \frac{w_i \Delta_{i,j}}{w_0} \log \frac{w_i(p_{i,j} + \Delta_{i,j})}{w_0} \quad (10)$$

Now we prove the first two terms and the last term are larger than zeros respectively.

$$- \sum_i \sum_j \frac{w_i p_{i,j}}{w_0} \log \frac{w_i(p_{i,j} + \Delta_{i,j})}{w_0} + \sum_i \sum_j \frac{w_i p_{i,j}}{w_0} \log \frac{w_i p_{i,j}}{w_0} \quad (11)$$

$$= \sum_i \sum_j \frac{w_i p_{i,j}}{w_0} \log \frac{\frac{w_i p_{i,j}}{w_0}}{\frac{w_i(p_{i,j} + \Delta_{i,j})}{w_0}} \quad (12)$$

$$\geq \sum_i \sum_j \frac{w_i p_{i,j}}{w_0} \log \frac{\sum_i \sum_j \frac{w_i p_{i,j}}{w_0}}{\sum_i \sum_j \frac{w_i(p_{i,j} + \Delta_{i,j})}{w_0}} \quad (13)$$

$$= \sum_i \sum_j \frac{w_i p_{i,j}}{w_0} \log 1 = 0 \quad (14)$$

by the definition of transition probability  $\sum_j (p_{i,j} + \Delta_{i,j}) = \sum_j p_{i,j} = 1$  and the *Log-sum inequality* stated as follows.

**Proposition 1.1.** (*Log-sum inequality*) For non-negative numbers  $a_1, a_2, \dots, a_n$  and  $b_1, b_2, \dots, b_n$

$$\sum_{i=1}^n a_i \log \frac{a_i}{b_i} \geq \left( \sum_{i=1}^n a_i \right) \log \frac{\sum_{i=1}^n a_i}{\sum_{i=1}^n b_i} \quad (15)$$

with equality if and only if  $\frac{a_i}{b_i} = \text{constant}$ .

$$- \sum_i \sum_j \frac{w_i \Delta_{i,j}}{w_0} \log \frac{w_i(p_{i,j} + \Delta_{i,j})}{w_0} \quad (16)$$

$$= - \sum_i \sum_{j \neq i} \frac{w_i \Delta_{i,j}}{w_0} \log \frac{w_i(p_{i,j} + \Delta_{i,j})}{w_0} - \sum_i \frac{w_i \Delta_{i,i}}{w_0} \log \frac{w_i(p_{i,i} + \Delta_{i,i})}{w_0} \quad (17)$$

$$= - \sum_i \sum_{j \neq i} \frac{w_i \Delta_{i,j}}{w_0} \log \frac{w_i(p_{i,j} + \Delta_{i,j})}{w_0} + \sum_i \sum_{j \neq i} \frac{w_i \Delta_{i,j}}{w_0} \log \frac{w_i(p_{i,i} + \Delta_{i,i})}{w_0} \quad (18)$$

$$= \sum_i \sum_{j \neq i} \frac{w_i \Delta_{i,j}}{w_0} \log \frac{p_{i,i} + \Delta_{i,i}}{p_{i,j} + \Delta_{i,j}} \quad (19)$$

## 1.1 Submodularity

*Proof.* We prove the submodularity by showing

$$\mathcal{H}(\mathcal{S} \cup \{a_1\}) - \mathcal{H}(\mathcal{S}) \geq \mathcal{H}(\mathcal{S} \cup \{a_1, a_2\}) - \mathcal{H}(\mathcal{S} \cup \{a_2\}). \quad (20)$$

Similarly, for simplicity of notation, we let  $p_{i,j}(\mathcal{S} \cup \{a_1\}) = p_{i,j} + \Delta_{i,j}^1$  and  $p_{i,j}(\mathcal{S} \cup \{a_1, a_2\}) = p_{i,j} + \Delta_{i,j}^1 + \Delta_{i,j}^2$ .

$$\mathcal{H}(\mathcal{S} \cup \{a_1\}) - \mathcal{H}(\mathcal{S}) - \mathcal{H}(\mathcal{S} \cup \{a_1, a_2\}) + \mathcal{H}(\mathcal{S} \cup \{a_2\}) \quad (21)$$

$$= - \sum_i \sum_j \frac{w_i(p_{i,j} + \Delta_{i,j}^1)}{w_0} \log \frac{w_i(p_{i,j} + \Delta_{i,j}^1)}{w_0} + \sum_i \sum_j \frac{w_i p_{i,j}}{w_0} \log \frac{w_i p_{i,j}}{w_0} \quad (22)$$

$$+ \sum_i \sum_j \frac{w_i(p_{i,j} + \Delta_{i,j}^1 + \Delta_{i,j}^2)}{w_0} \log \frac{w_i(p_{i,j} + \Delta_{i,j}^1 + \Delta_{i,j}^2)}{w_0} - \sum_i \sum_j \frac{w_i(p_{i,j} + \Delta_{i,j}^2)}{w_0} \log \frac{w_i(p_{i,j} + \Delta_{i,j}^2)}{w_0} \quad (23)$$

$$= - \sum_i \sum_j \frac{w_i(p_{i,j} + \Delta_{i,j}^1)}{w_0} \log \frac{w_i(p_{i,j} + \Delta_{i,j}^1)}{w_0} + \sum_i \sum_j \frac{w_i(p_{i,j} + \Delta_{i,j}^1)}{w_0} \log \frac{w_i(p_{i,j} + \Delta_{i,j}^1 + \Delta_{i,j}^2)}{w_0} \quad (24)$$

$$+ \sum_i \sum_j \frac{w_i \Delta_{i,j}^2}{w_0} \log \frac{w_i(p_{i,j} + \Delta_{i,j}^1 + \Delta_{i,j}^2)}{w_0} - \sum_i \sum_j \frac{w_i(p_{i,j} + \Delta_{i,j}^2)}{w_0} \log \frac{w_i(p_{i,j} + \Delta_{i,j}^2)}{w_0} \quad (25)$$

$$+ \sum_i \sum_j \frac{w_i p_{i,j}}{w_0} \log \frac{w_i p_{i,j}}{w_0} \quad (26)$$

$$= - \sum_i \sum_j \frac{w_i(p_{i,j} + \Delta_{i,j}^1)}{w_0} \log \frac{w_i(p_{i,j} + \Delta_{i,j}^1)}{w_0} + \sum_i \sum_j \frac{w_i(p_{i,j} + \Delta_{i,j}^1)}{w_0} \log \frac{w_i(p_{i,j} + \Delta_{i,j}^1 + \Delta_{i,j}^2)}{w_0} \quad (27)$$

$$+ \sum_i \sum_j \frac{w_i(p_{i,j} + \Delta_{i,j}^2)}{w_0} \log \frac{w_i(p_{i,j} + \Delta_{i,j}^1 + \Delta_{i,j}^2)}{w_0} - \sum_i \sum_j \frac{w_i(p_{i,j} + \Delta_{i,j}^2)}{w_0} \log \frac{w_i(p_{i,j} + \Delta_{i,j}^2)}{w_0} \quad (28)$$

$$+ \sum_i \sum_j \frac{w_i p_{i,j}}{w_0} \log \frac{w_i p_{i,j}}{w_0} - \sum_i \sum_j \frac{w_i p_{i,j}}{w_0} \log \frac{w_i(p_{i,j} + \Delta_{i,j}^1 + \Delta_{i,j}^2)}{w_0} \quad (29)$$

$$= \sum_i \sum_j \frac{w_i(p_{i,j} + \Delta_{i,j}^1)}{w_0} \log \frac{\frac{w_i(p_{i,j} + \Delta_{i,j}^1 + \Delta_{i,j}^2)}{w_0}}{\frac{w_i(p_{i,j} + \Delta_{i,j}^1)}{w_0}} \quad (30)$$

$$+ \sum_i \sum_j \frac{w_i(p_{i,j} + \Delta_{i,j}^2)}{w_0} \log \frac{\frac{w_i(p_{i,j} + \Delta_{i,j}^1 + \Delta_{i,j}^2)}{w_0}}{\frac{w_i(p_{i,j} + \Delta_{i,j}^2)}{w_0}} \quad (31)$$

$$+ \sum_i \sum_j \frac{w_i p_{i,j}}{w_0} \log \frac{\frac{w_i p_{i,j}}{w_0}}{\frac{w_i(p_{i,j} + \Delta_{i,j}^1 + \Delta_{i,j}^2)}{w_0}} \quad (32)$$

$$\geq \sum_i \sum_j \frac{w_i(p_{i,j} + \Delta_{i,j}^1)}{w_0} \log \frac{\sum_i \sum_j \frac{w_i(p_{i,j} + \Delta_{i,j}^1 + \Delta_{i,j}^2)}{w_0}}{\sum_i \sum_j \frac{w_i(p_{i,j} + \Delta_{i,j}^1)}{w_0}} \quad (33)$$

$$+ \sum_i \sum_j \frac{w_i(p_{i,j} + \Delta_{i,j}^2)}{w_0} \log \frac{\sum_i \sum_j \frac{w_i(p_{i,j} + \Delta_{i,j}^1 + \Delta_{i,j}^2)}{w_0}}{\sum_i \sum_j \frac{w_i(p_{i,j} + \Delta_{i,j}^2)}{w_0}} \quad (34)$$

$$+ \sum_i \sum_j \frac{w_i p_{i,j}}{w_0} \log \frac{\sum_i \sum_j \frac{w_i p_{i,j}}{w_0}}{\sum_i \sum_j \frac{w_i(p_{i,j} + \Delta_{i,j}^1 + \Delta_{i,j}^2)}{w_0}} \quad (35)$$

$$= \sum_i \sum_j \frac{w_i(p_{i,j} + \Delta_{i,j}^1)}{w_0} \log 1 + \sum_i \sum_j \frac{w_i(p_{i,j} + \Delta_{i,j}^2)}{w_0} \log 1 + \sum_i \sum_j \frac{w_i p_{i,j}}{w_0} \log 1 \quad (36)$$

$$= 0. \quad (37)$$

by the definition of the transition probability

$$\sum_j p_{i,j} = \sum_j (p_{i,j} + \Delta_{i,j}^1) = \sum_j (p_{i,j} + \Delta_{i,j}^1 + \Delta_{i,j}^2) = 1 \quad (38)$$

## 2 Proof of Proposition 2

The proof contains two parts. The first part proves  $\mathcal{Q}(\mathcal{S})$  is monotonically increasing. In the second part, we show that  $\mathcal{Q}(\mathcal{S})$  is submodular.

### 2.1 Proof of the monotonically increasing property

*Proof.* Let  $\mathcal{S}$  be a subset of attributes and  $a_1 \in \mathcal{P}$  be any attribute. We prove the monotonically increasing property

$$\mathcal{Q}(\mathcal{S} \cup \{a_1\}) - \mathcal{Q}(\mathcal{S}) \geq 0. \quad (39)$$

$$\mathcal{Q}(\mathcal{S} \cup \{a_1\}) - \mathcal{Q}(\mathcal{S}) = \sum_{u_l \in \mathcal{U}} \max_{d \in \mathcal{S} \cup \{a_1\}} A_{d,l} - \sum_{u_l \in \mathcal{U}} \max_{d \in \mathcal{S}} A_{d,l} \quad (40)$$

$$= \sum_{u_l \in \mathcal{U}} [\max(\max_{d \in \mathcal{S}} A_{d,l}, A_{1,l}) - \max_{d \in \mathcal{S}} A_{d,l}] \geq 0 \quad (41)$$

### 2.2 Proof of the submodularity

*Proof.* We prove the submodularity by showing

$$\mathcal{Q}(\mathcal{S} \cup \{a_1\}) - \mathcal{Q}(\mathcal{S}) \geq \mathcal{Q}(\mathcal{S} \cup \{a_1, a_2\}) - \mathcal{Q}(\mathcal{S} \cup \{a_2\}). \quad (42)$$

$$\begin{aligned} & \mathcal{Q}(\mathcal{S} \cup \{a_1\}) - \mathcal{Q}(\mathcal{S}) \geq \mathcal{Q}(\mathcal{S} \cup \{a_1, a_2\}) - \mathcal{Q}(\mathcal{S} \cup \{a_2\}) \quad (43) \\ & = \sum_{u_l \in \mathcal{U}} [\max(\max_{d \in \mathcal{S}} A_{d,l}, A_{1,l}) - \max_{d \in \mathcal{S}} A_{d,l} - \max(\max_{d \in \mathcal{S}} A_{d,l}, A_{1,l}, A_{2,l}) + \max(\max_{d \in \mathcal{S}} A_{d,l}, A_{2,l})]. \end{aligned} \quad (44)$$

Depending on which term from the three terms  $\max_{d \in \mathcal{S}} A_{d,l}$ ,  $A_{1,l}$  and  $A_{2,l}$  is largest, we consider three cases and prove that

$$Q_l = \max(\max_{d \in \mathcal{S}} A_{d,l}, A_{1,l}) - \max_{d \in \mathcal{S}} A_{d,l} - \max(\max_{d \in \mathcal{S}} A_{d,l}, A_{1,l}, A_{2,l}) + \max(\max_{d \in \mathcal{S}} A_{d,l}, A_{2,l}) \geq 0 \quad (45)$$

for given  $u_l \in \mathcal{U}$ .

**Case 1:** Assume that  $\max_{d \in \mathcal{S}} A_{d,l}$  is the largest, i.e.  $\max_{d \in \mathcal{S}} A_{d,l} \geq A_{1,l}, \max_{d \in \mathcal{S}} A_{d,l} \geq A_{2,l}$ , then

$$Q_l = \max_{d \in \mathcal{S}} A_{d,l} - \max_{d \in \mathcal{S}} A_{d,l} - \max_{d \in \mathcal{S}} A_{d,l} + \max_{d \in \mathcal{S}} A_{d,l} = 0. \quad (46)$$

**Case 2:** Assume that  $A_{1,l}$  is the largest, i.e.  $A_{1,l} \geq \max_{d \in \mathcal{S}} A_{d,l}, A_{1,l} \geq \max_{d \in \mathcal{S}}$ , then

$$Q_l = A_{1,l} - \max_{d \in \mathcal{S}} A_{d,l} - A_{1,l} + \max_{d \in \mathcal{S}} A_{d,l} \quad (47)$$

$$= \max(\max_{d \in \mathcal{S}} A_{d,l}, A_{2,l}) - \max_{d \in \mathcal{S}} A_{d,l} \geq 0. \quad (48)$$

**Case 3:** Assume that  $A_{2,l}$  is the largest, i.e.  $A_{2,l} \geq \max_{d \in \mathcal{S}} A_{d,l}, A_{2,l} \geq \max_{d \in \mathcal{S}}$ , then

$$Q_l = \max(\max_{d \in \mathcal{S}} A_{d,l}, A_{1,l}) - \max_{d \in \mathcal{S}} A_{d,l} - A_{2,l} + A_{2,l} \quad (49)$$

$$= \max(\max_{d \in \mathcal{S}} A_{d,l}, A_{1,l}) - \max_{d \in \mathcal{S}} A_{d,l} \geq 0. \quad (50)$$
